# Supplementary material for: Triassic–Jurassic environmental instability on the subtropical eastern Tethyan margin linked to the dinosaur occurrence
Source: Research Square preprint supplement (doi:10.21203/rs.3.rs-6720557/v1), 2025-05-23
Supplement: Supplementary file 1 [file 0334046df9e9d82e10298ab7.xlsx]

## Sheet: Sheet1
Formation	Sample ID	Depth	Age	δ13Corg	TOC	Cu	Hg	Hg/TOC	Hg isotope_d202	Hg isotope_D199	SiO2	TiO2	Al2O3	TFe2O3	MnO	MgO	CaO	Na2O	K2O	P2O5	LOI	CIA
		m	Ma	‰	%	μg/g	ng/g	ppb/wt%			%	%	%	%	%	%	%	%	%	%	%
Lufeng Fm.	WD1-1	1.95	199.992	-25.995	12.4806	15.9368	47.0581	3.77051			56.6493	0.9471	19.2013	7.9469	0.2015	2.061	2.3355	0.4836	3.2886	0.1676	6.738	78.8493
Lufeng Fm.	WD1-2	2.45	199.999				37.1647
Lufeng Fm.	WD1-3	2.95	200.006	-22.21	4.09225		28.8242	7.04361
Lufeng Fm.	WD1-4	3.45	200.012				21.1522
Lufeng Fm.	WD1-5	4	200.02	-23.823	3.73779	22.9077	6.5295	1.74689			70.6309	0.8944	13.9851	3.7344	0.1284	1.5775	1.3186	1.2714	1.9466	0.1421	4.348	69.094
Lufeng Fm.	WD1-6	4.51	200.027				57.5426
Lufeng Fm.	WD1-7	5.02	200.034	-24.921	4.71211		69.2907	14.7048
Lufeng Fm.	WD1-8	5.53	200.041				51.2254
Lufeng Fm.	WD1-9	5.95	200.047	-24.446	3.85946		18.7995	4.87102
Lufeng Fm.	WD1-10	6.46	200.054				51.3384
Lufeng Fm.	WD1-11	7.1	200.063	-25.283	2.83934	34.3351	38.7789	13.6577			70.6201	0.7427	13.4681	5.2902	0.1225	1.4423	1.2657	0.9474	1.992	0.1207	4.189	71.8635
Lufeng Fm.	WD1-12	7.6	200.069				7.59
Lufeng Fm.	WD1-13	8.1	200.076	-25.228	2.32857		12.4456	5.34475
Lufeng Fm.	WD1-14	8.6	200.083	-25.793	1.95146		11.3518	5.81709
Lufeng Fm.	WD1-15	9.15	200.091	-24.197	21.5242	10.7449	7.136	0.331534			59.8779	0.831	18.0715	7.0066	0.0511	1.5737	2.8849	0.4797	2.3609	0.0809	7.123	81.3843
Lufeng Fm.	WD1-16	9.94	200.102				4.1518
Lufeng Fm.	WD1-17	10.6	200.111	-23.824	30.5916		2.8901	0.0944737
Lufeng Fm.	WD1-18	11.1	200.117				3.2507
Lufeng Fm.	WD1-19	11.6	200.124	-24.345	13.7735		2.0281	0.147246
Lufeng Fm.	WD1-20	12.08	200.131				7.4248
Lufeng Fm.	WD1-21	12.62	200.138	-24.074	9.48575	9.12323	20.9406	2.20758			63.9073	0.8611	17.3137	7.1016	0.03	1.3584	1.1073	0.4494	2.5468	0.0765	5.406	80.3462
Lufeng Fm.	WD1-22	13.15	200.146				34.794
Lufeng Fm.	WD1-23	13.69	200.153	-24.359	4.5194		55.741	12.3337
Lufeng Fm.	WD1-24	14.23	200.16				7.3973
Lufeng Fm.	WD1-25	14.44	200.163	-24.473	3.87009	23.7926	25.7887	6.66359			54.3164	0.594	10.7688	3.4272	0.2051	1.3471	12.9838	0.5446	1.3728	0.0436	14.035	76.6655
Lufeng Fm.	WD1-26	15.03	200.171				27.912
Yubacun Fm.	WD1-27	15.59	200.179	-25.341	3.58621		27.4502	7.65438
Yubacun Fm.	WD1-28	16.03	200.185				20.0259
Yubacun Fm.	WD1-29	16.56	200.192	-24.631	2.63847		19.2309	7.28866
Yubacun Fm.	WD1-30	17.09	200.2				21.2005
Yubacun Fm.	WD1-31	17.62	200.207	-24.806	3.3375	18.183	29.7686	8.91942			75.0968	0.6227	10.5362	2.6823	0.1283	1.4071	2.4939	1.3894	1.2989	0.0892	4.471	63.8041
Yubacun Fm.	WD1-32	17.84	200.21				77.4388
Yubacun Fm.	WD1-33	18.37	200.217	-23.955	2.96197		36.6633	12.378	-2.44359	-0.0136012
Yubacun Fm.	WD1-34	18.9	200.225	-23.836	3.77026		19.3886	5.14251
Yubacun Fm.	WD1-35	19.73	200.236	-24.477	5.04344	20.808	44.8789	8.89846			60.5737	0.8731	16.7745	7.1238	0.0631	2.433	2.2995	0.9658	2.7562	0.1476	6.049	73.1383
Yubacun Fm.	WD1-36	20.23	200.243				35.0034
Yubacun Fm.	WD1-37	20.73	200.25	-24.728	4.42785		75.8749	17.1358
Yubacun Fm.	WD1-38	21.18	200.256				51.2338
Yubacun Fm.	WD1-39	21.68	200.263	-24.592	4.68884		49.6775	10.5948
Yubacun Fm.	WD1-40	22.18	200.27				9.0025
Yubacun Fm.	WD1-41	22.68	200.276	-24.131	9.32842	12.375	3.2534	0.348762			56.2562	0.8986	21.5768	8.889	0.0148	2.3524	0.382	0.3982	3.6875	0.0784	5.583	80.7215
Yubacun Fm.	WD1-42	23.18	200.283				1.9536
Yubacun Fm.	WD1-43	23.53	200.288	-24.427	5.10047		2.6564	0.520814
Yubacun Fm.	WD1-44	24.03	200.295				3.4919
Yubacun Fm.	WD1-45	24.53	200.302	-23.87	16.2009	16.9708	3.05255	0.188419			58.6705	0.8945	21.9342	6.2131	0.0112	1.4094	0.9262	0.6545	2.0237	0.0884	6.68	83.4699
Yubacun Fm.	WD1-46	25.03	200.309				4.7974
Yubacun Fm.	WD1-47	25.53	200.316	-24.302	3.68271		1.8179	0.493631
Yubacun Fm.	WD1-48	26.03	200.322				2.7064
Yubacun Fm.	WD1-49	26.53	200.329
Yubacun Fm.	WD1-50	26.91	200.334				2.061
Yubacun Fm.	WD1-51	27.45	200.342	-24.916	3.44046	14.233	1.4202	0.412793			55.2317	0.8607	20.7898	10.2784	0.0216	2.6758	0.5033	0.4061	3.7902	0.1457	5.388	79.5737
Yubacun Fm.	WD1-52	27.98	200.349				4.22
Yubacun Fm.	WD1-53	28.52	200.357	-23.381	4.2735		1.52276	0.356325
Yubacun Fm.	WD1-54	29.06	200.364				10.8637
Yubacun Fm.	WD1-55	29.59	200.371	-24.594	6.06515	9.87139	2.5665	0.423155			48.9484	0.831	21.9042	9.5855	0.0662	2.442	3.7165	0.4465	2.4598	0.1542	8.884	84.1315
Yubacun Fm.	WD1-56	29.97	200.377				4.2013
Yubacun Fm.	WD1-57	30.57	200.385	-25.364	2.87335		3.6955	1.28613
Yubacun Fm.	WD1-58	31.16	200.393				2.8708
Yubacun Fm.	WD1-59	31.76	200.401	-24.966	2.48861		11.1918	4.49722
Yubacun Fm.	WD1-60	32.36	200.409				4.2868
Yubacun Fm.	WD1-61	32.86	200.416	-23.945	3.49126	13.1534	13.882	3.97621			56.8191	0.9014	20.9419	8.6105	0.0191	2.764	0.3372	0.3399	3.4829	0.1026	5.532	81.6822
Yubacun Fm.	WD1-62	33.42	200.424				18.9473
Yubacun Fm.	WD1-63	33.97	200.431		3.51635		27.5866	7.84525
Yubacun Fm.	WD1-64	34.53	200.439				33.6586
Yubacun Fm.	WD1-65	35.09	200.447			13.8779	39.5682				47.4442	0.5885	13.203	6.0961	0.3314	2.9571	11.6446	0.3259	2.0404	0.1122	14.819	80.0972
Yubacun Fm.	WD1-66	35.64	200.454				50.2741
Yubacun Fm.	WD1-67	36.03	200.46	-25.615	2.22471		110.793
Yubacun Fm.	WD1-68	36.53	200.467				107.096
Yubacun Fm.	WD1-69	37.03	200.473				55.9441
Yubacun Fm.	WD1-70	37.53	200.48				33.4189
Yubacun Fm.	WD1-71	38.03	200.487			13.3832	41.9043				65.8423	0.697	12.0325	5.5472	0.1194	2.5802	3.6479	0.8976	1.7203	0.1133	7.251	71.4192
Yubacun Fm.	WD1-72	38.53	200.494				44.9262
Yubacun Fm.	WD1-73	38.83	200.498				43.4431
Yubacun Fm.	WD1-74	39.33	200.505				5.5639
Yubacun Fm.	WD1-75	39.83	200.512	-21.357	4.73907	13.0809	5.4432	1.14858			51.1281	0.7792	19.4156	8.3528	0.1253	2.3697	4.596	0.4103	3.8709	0.7117	7.878	77.8015
Yubacun Fm.	WD1-76	40.33	200.519				12.8503
Yubacun Fm.	WD1-77	40.83	200.526	-21.985	5.5987		3.9009	0.696751
Yubacun Fm.	WD1-78	41.33	200.532				3.791
Yubacun Fm.	WD1-79	41.73	200.538	-24.442	4.93335		1.9095	0.387059
Yubacun Fm.	WD1-80	42.21	200.545				2.5618
Yubacun Fm.	WD1-81	42.75	200.552	-24.903	2.75236	11.0915	62.2564	22.6193			53.3307	0.8519	19.9108	9.8414	0.0712	3.2186	1.9132	0.441	3.6886	0.1863	6.867	78.5306
Yubacun Fm.	WD1-82	43.28	200.559				6.7244
Yubacun Fm.	WD1-83	43.82	200.567	-25.087	3.40089		34.8385	10.2439
Yubacun Fm.	WD1-84	44.36	200.574				23.4854
Yubacun Fm.	WD1-85	44.6	200.577	-23.322	5.34502	18.1817	48.6492	9.10179			54.1281	0.8525	20.5462	9.1595	0.053	2.9064	1.3004	0.459	3.8656	0.1699	6.246	78.2999
Yubacun Fm.	WD1-86	45.2	200.586				43.0496
Yubacun Fm.	WD1-87	45.81	200.594	-23.778	5.44196		54.0243	9.92735
Yubacun Fm.	WD1-88	46.42	200.602	-22.707	5.27614		52.2619	9.90532
Yubacun Fm.	WD1-89	46.94	200.609	-23.431	5.62258		13.6355	2.42513
Yubacun Fm.	WD1-90	47.47	200.617				24.7568
Yubacun Fm.	WD1-91	48	200.624	-23.903	5.73302	9.80255	71.7421	12.5138	-1.73135	-0.0220989	55.049	0.891	20.2971	9.2977	0.0444	2.8003	1.0699	0.4702	3.7271	0.1766	6.051	78.4331
Yubacun Fm.	WD1-92	48.53	200.631				9.2881
Yubacun Fm.	WD1-93	49.05	200.638	-24.1313	3.97552		4.45006	1.11937
Yubacun Fm.	WD1-94	49.58	200.646				5.2462
Yubacun Fm.	WD1-95	49.94	200.651	-24.143	4.26005	13.0644	21.21	4.97882			60.9703	0.8483	16.5605	8.4912	0.0589	2.4922	1.4272	0.7841	2.7904	0.1771	5.715	74.7297
Yubacun Fm.	WD1-96	50.48	200.658				10.5305
Yubacun Fm.	WD1-97	51.02	200.666	-21.3312	5.92956		20.0096	3.37455
Yubacun Fm.	WD1-98	51.56	200.673				42.3004
Yubacun Fm.	WD1-99	52.1	200.68	-23.6976	3.85888		48.0293	12.4464
Yubacun Fm.	WD1-100	52.63	200.687	-24.9927	4.67532		15.4463	3.30378
Yubacun Fm.	WD1-101	53.05	200.693	-24.523	3.08725	9.46597	3.84756	1.24627			74.716	0.542	7.9922	2.6954	0.2442	1.7185	4.2139	1.4028	0.9217	0.0909	6.089	58.7438
Yubacun Fm.	WD1-102	53.57	200.7	-24.3951	2.91687		12.4291	4.26111
Yubacun Fm.	WD1-103	54.1	200.707	-24.3101	4.01379		28.7469	7.16205
Yubacun Fm.	WD1-104	54.62	200.714	-25.863	3.87338		19.7224	5.09178
Yubacun Fm.	WD1-105	55.15	200.721	-24.3081	2.47564	49.0063	38.7624	15.6576			67.2344	0.4869	7.5567	3.0424	0.6051	1.1367	8.5806	1.4842	0.8532	0.0834	9.017	56.548
Yubacun Fm.	WD1-106	55.68	200.728	-23.9144	3.44533		81.4535	23.6417
Yubacun Fm.	WD1-107	55.95	200.731	-23.664	3.69979		16.2728	4.39831
Yubacun Fm.	WD1-108	56.45	200.738				70.8699
Yubacun Fm.	WD1-109	56.95	200.744	-24.472	4.55572		17.6307	3.87001
Yubacun Fm.	WD1-110	57.45	200.751	-24.698	3.53338		36.0221	10.1948	-0.81387	-0.0551877
Yubacun Fm.	WD1-111	57.95	200.758	-21.512	8.15377	8.01743	47.6036	5.83823			53.7395	0.8257	21.9696	10.6813	0.0176	2.2279	0.5944	0.3245	3.866	0.2331	5.636	80.7396
Yubacun Fm.	WD1-112	58.45	200.764				25.053
Yubacun Fm.	WD1-113	58.88	200.77	-24.313	6.33656		27.5226	4.34346
Yubacun Fm.	WD1-114	59.38	200.777	-24.431	6.524		11.612	1.77989
Yubacun Fm.	WD1-115	59.88	200.783	-25.208	5.93377	11.9027	6.0005	1.01125			74.2402	0.7169	12.7189	5.7667	0.0188	0.8438	0.3681	0.5144	1.4519	0.0547	3.685	81.1419
Yubacun Fm.	WD1-116	60.38	200.79	-23.481	5.84225		5.17423	0.885658
Yubacun Fm.	WD1-117	60.88	200.797	-24.584	5.9791		5.0721	0.848304
Yubacun Fm.	WD1-118	61.38	200.803
Yubacun Fm.	WD1-119	62.09	200.813	-24.541	5.22619		9.6139	1.83956
Yubacun Fm.	WD1-120	62.6	200.819				3.579
Yubacun Fm.	WD1-121	63.11	200.826	-23.952	3.10107	12.9492	6.76	2.17989			73.4849	0.7257	13.0225	5.7632	0.0172	0.8404	0.3848	0.5194	1.4558	0.065	3.906	81.4077
Yubacun Fm.	WD1-122	63.62	200.833	-24.468	7.31849		4.05085	0.553509
Yubacun Fm.	WD1-123	63.13	200.826	-22.474	5.42757		10.8335	1.99601
Yubacun Fm.	WD1-124	64.64	200.846				5.6719
Yubacun Fm.	WD1-125	65.09	200.852	-23.886	7.48057	29.0738	6.515	0.870922			72.2381	0.7542	13.8401	5.1176	0.0152	1.0203	0.3776	0.5576	1.6154	0.0762	3.949	81.3649
Yubacun Fm.	WD1-126	65.6	200.859				8.474
Yubacun Fm.	WD1-127	66.11	200.866	-24.474	4.53237		5.8131	1.28258
Yubacun Fm.	WD1-128	66.62	200.872	-24.482	5.32889		2.99523	0.562074
Yubacun Fm.	WD1-129	67.14	200.879	-25.675	2.51213		9.5041	3.78328
Yubacun Fm.	WD1-130	67.65	200.886				8.1261
Yubacun Fm.	WD1-131	68.07	200.892	-23.8705	3.17749	13.9885	36.96	11.6318			44.2067	0.6763	14.4636	6.3545	0.2558	1.7356	14.1314	0.4418	2.2644	0.1288	14.968	78.743
Yubacun Fm.	WD1-132	68.59	200.899	-23.369	4.56131		10.3964	2.27926
Yubacun Fm.	WD1-133	69.11	200.905	-21.4111			61.6633
Yubacun Fm.	WD1-134	69.62	200.912	-23.565	3.675		31.9801	8.70207
Yubacun Fm.	WD1-135	70.14	200.919	-22.031	5.64012	13.4131	7.9236	1.40486			55.8081	0.9093	21.4832	8.585	0.0326	2.145	0.829	0.4408	3.2476	0.1469	6.001	81.2262
Yubacun Fm.	WD1-136	70.66	200.926				8.5434
Yubacun Fm.	WD1-137	71.06	200.931				16.4461
Yubacun Fm.	WD1-138	71.6	200.938	-24.321	7.32973		27.6444	3.77154
Yubacun Fm.	WD1-139	72.15	200.946	-24.452	6.40218		30.6882	4.7934
Yubacun Fm.	WD1-140	72.69	200.953				8.0945
Yubacun Fm.	WD1-141	73.24	200.96	-24.207	11.421	16.6434	17.7961	1.55819			63.8297	0.8445	18.0595	6.6909	0.0355	1.7479	0.6865	0.5919	2.697	0.1671	5.089	79.2069
Yubacun Fm.	WD1-142	73.73	200.967				60.7514
Yubacun Fm.	WD1-143	74.27	200.974	-24.355	9.11129		50.6672	5.56092
Yubacun Fm.	WD1-144	74.8	200.981				57.9665
Yubacun Fm.	WD1-145	75.34	200.988	-24.411	11.549	45.0935	55.2408	4.78315			69.7565	0.7725	14.8842	4.4647	0.04	1.3418	1.015	0.7619	1.9029	0.1469	4.629	76.5232
Yubacun Fm.	WD1-146	75.87	200.995				106.906
Yubacun Fm.	WD1-147	76.4	201.002
Yubacun Fm.	WD1-148	76.8	201.007				28.5482
Yubacun Fm.	WD1-149	77.32	201.014	-23.9154	3.31226		48.8443	14.7465	-1.04037	-0.0889898
Yubacun Fm.	WD1-150	77.84	201.021				65.7939
Yubacun Fm.	WD1-151	78.36	201.028	-22.9511	5.52451	10.9541	68.8221	12.4576	-1.56598	-0.0252624	56.4878	0.8502	20.8183	7.7922	0.0332	2.8112	0.664	0.683	4.1756	0.1693	5.135	76.3602
Yubacun Fm.	WD1-152	78.88	201.035				46.4379
Yubacun Fm.	WD1-153	79.4	201.042	-22.298	5.9853		49.507	8.27143
Yubacun Fm.	WD1-154	79.88	201.048				17.8896
Yubacun Fm.	WD1-155	80.39	201.055	-23.08	4.0321	14.9688	30.5151	7.56804			55.8855	0.8436	16.3855	8.8474	0.1538	3.1132	3.0515	0.9794	2.9957	0.1698	7.188	71.708
Yubacun Fm.	WD1-156	80.9	201.061				20.5844
Yubacun Fm.	WD1-157	81.41	201.068	-23.183	3.3259		7.4947	2.25344
Yubacun Fm.	WD1-158	81.92	201.073				39.7471
Yubacun Fm.	WD1-159	82.43	201.079	-24.989	3.65805		60.198	16.4563
Yubacun Fm.	WD1-160	82.88	201.084				25.888
Yubacun Fm.	WD1-161	83.39	201.09	-23.86	2.58869	30.2065	13.5741	5.24363			55.2289	0.776	15.0717	11.7166	0.1539	3.0302	3.293	0.9238	2.6967	0.1761	7.208	71.6678
Yubacun Fm.	WD1-162	83.9	201.095				10.3428
Yubacun Fm.	WD1-163	84.41	201.101	-21.875	1.96291		6.1712	3.1439
Yubacun Fm.	WD1-164	84.92	201.107				2.4645
Yubacun Fm.	WD1-165	85.43	201.112	-21.987	2.1043	14.5575	4.31	2.04819			56.2364	0.8077	15.6995	6.9439	0.1115	3.4727	4.2377	0.9428	2.8846	0.1518	8.51	71.61
Yubacun Fm.	WD1-166	85.88	201.117				24.5774
Yubacun Fm.	WD1-167	86.38	201.123	-23.078	4.38035		21.826	4.9827
Yubacun Fm.	WD1-168	86.88	201.128				23.3828
Yubacun Fm.	WD1-169	87.38	201.134	-21.788	1.23581		41.0827	33.2435
Yubacun Fm.	WD1-170	87.89	201.14				52.6041
Yubacun Fm.	WD1-171	88.39	201.145	-25.4034	2.41492	25.4305	12.0616	4.99462			71.9068	0.5831	10.2305	2.5577	0.1721	2.2841	3.6299	1.5996	1.5281	0.1396	6.045	59.6624
Yubacun Fm.	WD1-172	88.83	201.15				49.8602
Yubacun Fm.	WD1-173	89.33	201.156	-22.581	1.49092		53.5677	35.9294
Yubacun Fm.	WD1-174	89.83	201.161				28.8336
Yubacun Fm.	WD1-175	90.33	201.167	-22.959	1.84367	30.1891	5.5839	3.02868			56.2907	0.8128	16.2915	8.3836	0.1709	3.4693	2.9096	0.9474	3.1813	0.1598	7.417	71.2917
Yubacun Fm.	WD1-176	90.84	201.172				42.5868
Yubacun Fm.	WD1-177	91.34	201.178	-24.136	1.16835		14.9376	12.7852
Yubacun Fm.	WD1-178	91.73	201.182				44.9726
Yubacun Fm.	WD1-179	92.23	201.188	-22.39	1.20402		58.0446	48.2089	-3.42255	0.0276251
Yubacun Fm.	WD1-180	92.74	201.194				31.3899
Yubacun Fm.	WD1-181	93.24	201.199	-23.454	1.0714	31.2876	54.8383	51.1836	-2.97031	0.0474968	68.1672	0.7891	13.2102	3.2191	0.1427	2.525	2.471	1.4473	1.9735	0.1492	6.008	65.6962
Yubacun Fm.	WD1-182	93.74	201.205				20.2874
Yubacun Fm.	WD1-183	94.25	201.21	-25.984	2.20312		22.326	10.1338
Yubacun Fm.	WD1-184	94.73	201.216				11.4461
Yubacun Fm.	WD1-185	95.23	201.221	-26.288	2.3024	26.3807	39.5119	17.1612			74.2565	0.6879	11.4112	2.6515	0.1225	1.8321	1.9098	1.3819	1.7314	0.1642	4.537	63.9935
Yubacun Fm.	WD1-186	95.73	201.227				52.9939
Yubacun Fm.	WD1-187	96.23	201.232	-22.836	9.0935		23.4058	2.5739
Yubacun Fm.	WD1-188	96.74	201.238				9.5986
Yubacun Fm.	WD1-189	97.24	201.244	-25.489	2.54024		7.6905	3.02747
Yubacun Fm.	WD1-190	97.68	201.249				9.5683
Yubacun Fm.	WD1-191	98.18	201.254	-25.129	2.13278	11.4528	26.3763	12.3671			45.7702	0.4254	9.127	1.921	0.1614	0.8607	20.654	0.3631	1.1909	0.2748	19.093	78.609
Yubacun Fm.	WD1-192	98.68	201.26				5.6518
Yubacun Fm.	WD1-193	99.18	201.265	-24.194	2.20534		10.8687	4.92835
Yubacun Fm.	WD1-194	99.69	201.271				15.8244
Yubacun Fm.	WD1-195	100.19	201.277	-25.374	2.75932	31.6934	24.4706	8.86836			75.6564	0.7728	13.8741	2.219	0.008	0.8664	0.1884	1.0528	2.0169	0.1176	3.515	77.726
Yubacun Fm.	WD1-196	100.58	201.281				1.4172
Yubacun Fm.	WD1-197	101.08	201.286
Yubacun Fm.	WD1-198	101.58	201.292				22.6926
Yubacun Fm.	WD1-199	102.08	201.298	-21.423	3.04077		56.3276	18.5241
Yubacun Fm.	WD1-200	102.58	201.303				13.0951
Yubacun Fm.	WD1-201	103.08	201.309	-22.76	2.69831	11.5576	15.4092	5.71068			50.8016	0.7958	17.7664	11.8566	0.0505	2.4705	4.2813	0.3635	3.5084	2.2302	5.579	78.0606
Yubacun Fm.	WD1-202	103.58	201.314				19.8396
Yubacun Fm.	WD1-203	103.94	201.318	-23.702	2.07362		13.8591	6.68354
Yubacun Fm.	WD1-204	104.45	201.324				13.6676
Yubacun Fm.	WD1-205	104.97	201.33	-23.463	2.22814	13.1504	12.4617	5.59287			62.2681	0.8523	18.5572	8.1384	0.0095	1.5424	0.3513	0.366	3.4534	0.0549	4.414	79.2893
Yubacun Fm.	WD1-206	105.49	201.335				3.2986
Yubacun Fm.	WD1-207	106.01	201.341	-25.103	1.79607		5.0222	2.79622
Yubacun Fm.	WD1-208	106.52	201.347				2.4323
Yubacun Fm.	WD1-209	106.83	201.35	-23.523	2.19229		1.9216	0.876525
Yubacun Fm.	WD1-210	107.35	201.356				2.4168
Yubacun Fm.	WD1-211	107.87	201.362	-25.2	2.00631	14.7109	4.5299	2.25783			54.1183	0.7939	15.4796	6.3185	0.1932	3.3931	5.9567	0.7327	2.9035	0.1557	9.494	73.597
Yubacun Fm.	WD1-212	108.38	201.368				2.4285
Yubacun Fm.	WD1-213	108.9	201.373	-25.842	2.26594		1.9757	0.871912
Yubacun Fm.	WD1-214	109.42	201.379				5.2048
Yubacun Fm.	WD1-215	109.88	201.384	-22.649	3.04818	13.0529	6.4537	2.11723			55.7734	0.889	18.5452	7.9266	0.1087	3.2646	2.0613	0.4813	3.8415	0.1692	6.918	76.3596
Yubacun Fm.	WD1-216	110.39	201.39				9.1735
Yubacun Fm.	WD1-217	110.9	201.396	-26.691	2.19246		2.0803	0.948845
Yubacun Fm.	WD1-218	111.41	201.401				8.3873
Yubacun Fm.	WD1-219	111.92	201.407				1.7629
Yubacun Fm.	WD1-220	112.43	201.413				4.1432
Yubacun Fm.	WD1-221	112.88	201.418	-24.381	5.55045	26.2899	5.8482	1.05364			63.9664	0.8243	18.4739	6.2898	0.0089	1.5679	0.3093	0.3831	3.3305	0.0767	4.899	80.0163
Yubacun Fm.	WD1-222	113.39	201.423	-25.473	2.02337		25.7806	12.7414
Yubacun Fm.	WD1-223	113.9	201.429	-24.421	2.37469		39.7864	16.7543
Yubacun Fm.	WD1-224	114.41	201.435	-24.6571	3.0301		2.4001	0.792087
Yubacun Fm.	WD1-225	114.92	201.44	-27.685	1.98757	21.636	9.4768	4.76804			75.6175	0.6343	14.199	2.0592	0.0107	1.014	0.2018	1.0291	1.6579	0.0365	3.636	79.0331
Yubacun Fm.	WD1-226	115.43	201.446	-26.6338	2.13112		12.2712	5.75809
Yubacun Fm.	WD1-227	115.91	201.451	-26.598	2.01224		15.36	7.63329
Yubacun Fm.	WD1-228	116.41	201.457	-26.5279	1.87341		5.3179	2.83862
Yubacun Fm.	WD1-229	116.91	201.463	-24.452	2.83639		10.5022	3.70266
Yubacun Fm.	WD1-230	117.41	201.468	-26.1164	2.23602		10.6016	4.74129
Yubacun Fm.	WD1-231	117.91	201.473	-27.912	1.91658	37.94	2.5427	1.32669			69.9451	0.6108	9.635	2.614	0.2456	1.8915	5.174	1.2642	1.3245	0.1443	7.201	63.2718
Yubacun Fm.	WD1-232	118.41	201.479	-28.43	4.73643		3.4703	0.732683
Yubacun Fm.	WD1-233	118.89	201.483	-25.203	2.23824		23.0539	10.3
Yubacun Fm.	WD1-234	119.41	201.489	-28.0135	2.3029		2.2443	0.974556
Yubacun Fm.	WD1-235	119.93	201.494	-23.69	2.84912	33.3496	13.1839	4.62736			61.8339	0.9699	17.634	4.2714	0.1348	2.8668	1.6819	0.9292	3.0791	0.1501	6.281	73.4019
Yubacun Fm.	WD1-236	120.45	201.5	-24.9848	2.78232		2.8834	1.03633
Yubacun Fm.	WD1-237	120.97	201.505	-25.581	1.81532		2.4941	1.37392
Yubacun Fm.	WD1-238	121.49	201.51	-27.1946	1.72063		3.9192	2.27777
Yubacun Fm.	WD1-239	121.93	201.515	-22.859	3.36603		4.7308	1.40545
Yubacun Fm.	WD1-240	122.43	201.52				15.531
Yubacun Fm.	WD1-241	122.93	201.525	-23.9864	4.82026	14.7896	34.5188	7.16119	-1.06351	-0.0467798	66.1631	1.0664	20.4216	3.1705	0.0043	0.8525	0.5097	0.3047	2.2883	0.0567	5.673	85.4428
Yubacun Fm.	WD1-242	123.44	201.53				32.8449
Yubacun Fm.	WD1-243	123.94	201.536	-22.397	3.58689		34.3066	9.56443
Yubacun Fm.	WD1-244	124.44	201.541				21.4035
Yubacun Fm.	WD1-245	125.04	201.547	-25.595	2.08567	29.0503	6.8457	3.28225			68.4031	0.7257	15.6719	7.3061	0.005	0.7097	0.3452	0.2829	2.2007	0.0719	4.339	82.5935
Yubacun Fm.	WD1-246	125.55	201.552	-24.091	4.05445		11.9656	2.95122
Yubacun Fm.	WD1-247	126.07	201.558	-25.2378	3.53128		22.2914	6.31256
Yubacun Fm.	WD1-248	126.58	201.563				7.0588
Yubacun Fm.	WD1-249	127.09	201.568	-24.317	2.57539		4.0049	1.55506
Yubacun Fm.	WD1-250	127.61	201.574				4.5493
Yubacun Fm.	WD1-251	128.11	201.579	-24.1844	2.30706	8.36523	14.3594	6.2241			41.9298	0.5931	12.3586	6.0578	0.1902	1.0989	17.844	0.1719	2.4809	0.1517	17.268	79.1739
Yubacun Fm.	WD1-252	128.63	201.584				34.9082
Yubacun Fm.	WD1-253	129.15	201.589	-25.2821	2.93031		5.6328	1.92225
Yubacun Fm.	WD1-254	129.66	201.595				13.7808
Yubacun Fm.	WD1-255	130.18	201.6	-24.326	4.6965	21.2576	4.4118	0.939381			59.2154	0.8806	17.3792	8.9091	0.05	2.6699	1.4981	0.5221	3.596	0.2292	5.315	75.5973
Yubacun Fm.	WD1-256	130.7	201.605	-23.938	4.7792		17.9123	3.74797
Yubacun Fm.	WD1-257	131.13	201.61	-24.0733	5.05712		14.2899	2.8257
Yubacun Fm.	WD1-258	131.63	201.615				17.05
Yubacun Fm.	WD1-259	132.13	201.62	-24.2892	3.27059		25.6931	7.85581
Yubacun Fm.	WD1-260	133.14	201.631				32.0369
Yubacun Fm.	WD1-261	133.64	201.636	-23.9374	4.18367	25.5062	16.6761	3.986			67.2128	0.6606	11.1746	3.2484	0.134	2.9114	4.269	1.4174	1.7012	0.1336	7.591	63.2072
Yubacun Fm.	WD1-262	134.09	201.641				47.5663
Yubacun Fm.	WD1-263	134.61	201.646	-23.873	12.3387		57.8406	4.68773
Yubacun Fm.	WD1-264	135.13	201.651				25.3597
Yubacun Fm.	WD1-265	135.64	201.657	-23.997	15.8897	8.88308	3.0466	0.191735			54.9097	0.8713	18.8477	7.2724	0.0941	3.2928	2.6227	0.3279	3.9694	0.1484	7.577	77.8094
Yubacun Fm.	WD1-266	136.16	201.662				4.1807
Yubacun Fm.	WD1-267	136.68	201.667	-24.1103	14.6943		13.9538	0.949607
Yubacun Fm.	WD1-268	137.16	201.672				57.6631
Yubacun Fm.	WD1-269	137.66	201.677	-23.824	6.57474		53.1095	8.07781
Yubacun Fm.	WD1-270	138.16	201.683				43.8254
Yubacun Fm.	WD1-271	138.66	201.688	-24.977	3.17292	18.0602	46.0485	14.513			51.3267	0.6426	11.9266	11.0875	0.6507	2.4697	6.541	0.6979	2.0824	0.1149	12.793	72.3846
Yubacun Fm.	WD1-272	139.16	201.693				23.5367
Yubacun Fm.	WD1-273	139.66	201.698	-23.5946
Yubacun Fm.	WD1-274	140.11	201.703				10.2448
Yubacun Fm.	WD1-275	140.62	201.708	-24.16	16.1548	9.41903	67.2157	4.16073			50.5815	0.8905	19.874	10.9995	0.097	3.141	2.2562	0.1976	4.164	0.2034	7.342	79.3971
Yubacun Fm.	WD1-276	141.12	201.713	-24.0976	5.36004		53.7724	10.0321
Yubacun Fm.	WD1-277	141.62	201.718	-25.235	2.28321		16.9987	7.44508
Yubacun Fm.	WD1-278	142.13	201.724	-23.9646	11.7749		58.5511	4.97254
Yubacun Fm.	WD1-279	142.63	201.729	-24.6549	4.93601		19.081	3.86567
Yubacun Fm.	WD1-280	143.1	201.734	-26.4606	3.67393		10.5792	2.87953
Yubacun Fm.	WD1-281	143.62	201.739	-24.0084	9.21887	21.0235	12.3576	1.34047			70.8442	0.6473	11.6595	3.4733	0.1169	2.1949	2.2761	1.3328	1.72	0.1305	5.593	65.1142
Yubacun Fm.	WD1-282	144.14	201.744	-23.9526	21.7178		88.0975	4.05647
Yubacun Fm.	WD1-283	144.65	201.75	-24.1403	17.5965		42.9131	2.43873
Yubacun Fm.	WD1-284	145.17	201.755	-25.0316	2.72093		29.9671	11.0135
Yubacun Fm.	WD1-285	145.69	201.76	-26.61	2.33863	18.685	21.2202	9.07377			84.6859	0.4747	7.4066	1.7288	0.0346	0.5342	1.1071	1.2426	0.9002	0.0283	2.284	59.8747
Yubacun Fm.	WD1-286	146.18	201.765	-26.4716	3.2039		31.5033	9.8328
Yubacun Fm.	WD1-287	146.68	201.771	-25.207	3.38788		16.6482	4.91404
Yubacun Fm.	WD1-288	147.18	201.776	-23.9156	6.46327		21.1966	3.27955
Yubacun Fm.	WD1-289	147.68	201.781	-23.7246	8.46476		13.4487	1.58879
Yubacun Fm.	WD1-290	148.18	201.786	-24.4686	2.46947		51.7509	20.9563
Yubacun Fm.	WD1-291	148.68	201.791	-24.3446	4.36495	18.6865	52.1923	11.9571			67.3437	0.8358	15.2134	7.4904	0.0224	1.6247	0.2544	0.8039	2.908	0.0743	3.619	76.1888
Yubacun Fm.	WD1-292	149.08	201.795	-23.248	7.02203		17.0147	2.42305
Yubacun Fm.	WD1-293	149.59	201.801	-24.5979	13.3708		18.6305	1.39337
Yubacun Fm.	WD1-294	150.09	201.806				93.3913
Yubacun Fm.	WD1-295	150.6	201.811
Yubacun Fm.	WD1-296	151.1	201.816				43.6488
Yubacun Fm.	WD1-297	151.61	201.822	-23.3305	4.34091		72.4921	16.6997
Yubacun Fm.	WD1-298	151.96	201.825				60.5097
Yubacun Fm.	WD1-299	152.47	201.83	-24.3511	18.2938		17.0395	0.931437
Yubacun Fm.	WD1-300	152.97	201.836				24.3568
Yubacun Fm.	WD1-301	153.47	201.841	-24.5963	7.6538	32.3215	86.6999	11.3277			64.2361	0.7791	14.5435	4.6722	0.0981	2.7982	2.7008	1.1951	2.4857	0.1391	6.693	68.7118
Yubacun Fm.	WD1-302	153.98	201.846	-24.178	18.9879		46.4605	2.44684
Yubacun Fm.	WD1-303	154.48	201.851	-24.684	11.8402		15.278	1.29034
Yubacun Fm.	WD1-304	154.96	201.856				20.2751
Yubacun Fm.	WD1-305	155.47	201.861	-24.256	35.539	42.5641	35.5612	1.00062			59.0038	0.7986	14.8321	5.4819	0.1571	3.2038	4.163	1.0896	2.7806	0.1682	8.398	69.2227
Yubacun Fm.	WD1-306	155.97	201.867	-23.849	6.87656		74.9968	10.9062	-0.207372	-0.107716
Yubacun Fm.	WD1-307	156.48	201.872	-22.5571	4.20699		101.026	24.014
Yubacun Fm.	WD1-308	156.98	201.877
Yubacun Fm.	WD1-309	157.49	201.883	-23.8635	6.8002		56.8649	8.36224	-1.16681	-0.053758
Shezi Fm.	WD1-310	158	201.889	-23.82	6.45542		31.4863	4.8775
Shezi Fm.	WD1-311	158.53	201.895	-24.1672	7.79531	18.9799	48.9348	6.27747			61.9582	0.8022	14.6393	5.1976	0.092	2.8947	3.3306	1.1432	2.7133	0.1539	7.076	68.6088
Shezi Fm.	WD1-312	159.06	201.901	-23.49	7.78645		12.5186	1.60774
Shezi Fm.	WD1-313	159.59	201.907	-24.551	7.74494		15.0451	1.94257
Shezi Fm.	WD1-314	160.12	201.914				14.3109
Shezi Fm.	WD1-315	160.66	201.92	-23.7575	14.9811	58.2394	13.6297	0.909794			60.0162	0.7604	14.4997	7.4659	0.1345	2.8625	3.2916	1.0101	2.3498	0.1566	7.454	71.1942
Shezi Fm.	WD1-316	165.69	201.978				4.4459
Shezi Fm.	WD1-317	166.73	201.99	-24.6379	18.1365		82.1344	4.52868
Shezi Fm.	WD1-318	168.28	202.008				71.3325
Shezi Fm.	WD1-319	169.73	202.024	-24.654	21.4809		9.2083	0.428675
Shezi Fm.	WD1-320	171.1	202.04				12.5455
Shezi Fm.	WD1-321	173.17	202.064	-25.1119	35.8753	14.9083	4.4846	0.125005			53.2186	0.9464	19.6537	6.6736	0.0684	3.2668	2.5209	0.7947	4.0479	0.1647	7.985	73.7483
Shezi Fm.	WD1-322	174.28	202.077				28.6311
Shezi Fm.	WD1-323	178.73	202.128	-24.6601	88.7136		26.1594	0.294875
Shezi Fm.	WD1-324	180.49	202.149				9.2804
Shezi Fm.	WD1-325	181.73	202.163	-24.5695		28.5566	8.3345				52.4964	0.8723	18.0952	7.4507	0.1247	3.3161	3.3002	0.7472	3.6528	0.1668	9.318	73.8361
Shezi Fm.	WD1-326	182.23	202.169				8.9187
Shezi Fm.	WD1-327	184.23	202.192	-24.8494	75.5988		12.5866	0.166492
Shezi Fm.	WD1-328	186.23	202.215				13.7899
Shezi Fm.	WD1-329	187.73	202.232	-24.5179	22.4649		5.0361	0.224176
Shezi Fm.	WD1-330	189.03	202.247				1.4885
Shezi Fm.	WD1-331	191.51	202.276	-24.7287	74.6871	17.2011	5.5529	0.0743488			53.7776	0.9023	18.6814	7.9243	0.1643	3.096	2.3067	0.7673	3.7667	0.1873	8.445	73.8895
Shezi Fm.	WD1-332	193.31	202.297				24.7992
Shezi Fm.	WD1-333	193.73	202.301	-24.511	6.16458		31.2705	5.07261
Shezi Fm.	WD1-334	195.82	202.326				59.6429
Shezi Fm.	WD1-335	196.73	202.336	-24.3177	6.68597	9.29411	72.6799	10.8705			56.8059	0.9337	19.4161	10.6168	0.037	2.4464	0.4756	0.4308	4.1022	0.2135	4.681	77.9187
Shezi Fm.	WD1-336	197.53	202.345				74.7698
Shezi Fm.	WD1-337	199.73	202.371	-24.2804	13.2129		25.3419	1.91797
Shezi Fm.	WD1-338	201.52	202.392				54.5719
Shezi Fm.	WD1-339	202.73	202.406	-24.3801	14.5438		78.8224	5.41967
Shezi Fm.	WD1-340	205.37	202.436				6.3391
Shezi Fm.	WD1-341	210.23	202.492	-24.3918	39.1052	11.11	5.1887	0.132686			48.9339	1.2617	24.7566	6.0444	0.0431	3.3349	1.7986	1.1427	4.6502	0.1852	8.04	73.7913
Shezi Fm.	WD1-342	212.85	202.523				1.6757
Shezi Fm.	WD1-343	214.73	202.544	-24.4987	21.4828		5.9816	0.278436
Shezi Fm.	WD1-344	216.31	202.563				33.8674
Shezi Fm.	WD1-345	217.63	202.578	-24.415	49.2315	8.42398	7.7909	0.15825			53.3166	0.9721	20.8898	6.2785	0.0623	3.1768	2.1515	0.5181	4.4324	0.1712	7.45	76.2626
Shezi Fm.	WD1-346	218.44	202.587				1.5855
Shezi Fm.	WD1-347	219.67	202.602	-24.6399	18.5121		1.3179	0.0711913
Shezi Fm.	WD1-348	220.69	202.613				4.0495
Shezi Fm.	WD1-349	221.07	202.618	-24.4271	31.4767		4.3746	0.138979
Shezi Fm.	WD1-350	223.24	202.643				6.4887
Shezi Fm.	WD1-351	223.73	202.649	-24.3373	13.7731	12.3529	8.6747	0.62983			58.296	0.9315	20.0706	8.0833	0.0318	2.528	0.3505	0.5215	4.1083	0.1387	4.775	78.1554
Shezi Fm.	WD1-352	225.31	202.667				11.733
Shezi Fm.	WD1-353	226.97	202.686	-24.8436	37.2182		15.1217	0.406299
Shezi Fm.	WD1-354	227.72	202.695				62.9503
Shezi Fm.	WD1-355	229.16	202.711	-24.9562	3.81132	16.0413	78.4551	20.5848			59.5899	0.8966	17.8669	11.488	0.0193	2.0145	0.2559	0.4078	3.5162	0.0506	4.391	78.7515
Shezi Fm.	WD1-356	232.26	202.747				9.3842
Shezi Fm.	WD1-357	232.93	202.754	-24.6641	52.8875		5.3774	0.101676
Shezi Fm.	WD1-358	234.79	202.776				107.331
Shezi Fm.	WD1-359	235.05	202.778	-24.6268	18.1173		114.501	6.31998
Shezi Fm.	WD1-360	235.89	202.788				78.0371
Shezi Fm.	WD1-361	237.18	202.803	-24.5693	10.0343	37.9385	63.4027	6.31861			46.2113	0.8034	17.1225	8.2197	0.1727	2.8662	8.4506	0.3687	3.5825	0.1447	12.08	77.0826
Shezi Fm.	WD1-362	239.43	202.829				45.2028
Shezi Fm.	WD1-363	240.34	202.839	-24.4695	13.1915		6.6275	0.502406
Shezi Fm.	WD1-364	242.52	202.864				3.4315
Shezi Fm.	WD1-365	244.89	202.891	-24.6036	28.8282	9.84569	5.9962	0.207998			60.0745	1.0007	16.8516	4.4858	0.0487	3.2057	2.5499	1.647	2.9375	0.2255	6.955	66.2149
Shezi Fm.	WD1-366	246.98	202.915				28.9345
Shezi Fm.	WD1-367	247.79	202.924	-24.8746	86.6859		11.6047	0.133871
Shezi Fm.	WD1-368	249.25	202.941				29.7406
Shezi Fm.	WD1-369	250.52	202.955	-24.5191	18.4259		30.7673	1.66979
Shezi Fm.	WD1-370	252.29	202.976				8.2781
Shezi Fm.	WD1-371	253.84	202.993	-24.9758	11.0883	6.60781	9.3209	0.840605			71.9743	0.5228	8.9053	4.0995	0.0626	2.1169	3.8291	1.502	1.1508	0.1099	6.022	59.0043
Shezi Fm.	WD1-372	254.44	203				9.4883
Shezi Fm.	WD1-373	256.84	203.028				7.3406
Shezi Fm.	WD1-374	258.38	203.045				5.6847
Shezi Fm.	WD1-375	259.84	203.062	-24.3666	32.7197	29.1938	2.7667	0.0845576			54.2562	0.92	18.958	8.1443	0.0638	3.1708	2.3847	0.6367	3.8176	0.1555	7.196	75.2753
Shezi Fm.	WD1-376	260.59	203.071				65.0198
Shezi Fm.	WD1-377	261.79	203.084	-24.3736	44.9783		9.989	0.222085
Shezi Fm.	WD1-378	264.7	203.119				9.1728
Shezi Fm.	WD1-379	265.84	203.132	-24.2792	35.5776		5.6827	0.159727
Shezi Fm.	WD1-380	266.98	203.146				6.5578
Shezi Fm.	WD1-381	268.84	203.168	-24.4497	62.4541	23.3683	3.4456	0.0551701			53.919	0.8923	18.0521	7.7403	0.1538	2.7961	3.1661	0.7797	3.6103	0.1832	8.699	73.6066
Shezi Fm.	WD1-382	269.84	203.18				4.2603
Shezi Fm.	WD1-383	271.84	203.203	-24.4376	33.1473		3.2548	0.0981921
Shezi Fm.	WD1-384	271.15	203.195				3.3554
Shezi Fm.	WD1-385	274.84	203.239	-25.1082	7.63391	6.40497	3.0626	0.401184			69.7753	0.6417	11.3427	3.8713	0.0847	2.0875	3.3225	1.4113	1.7656	0.121	6.051	63.3775
Shezi Fm.	WD1-386	276.48	203.258				1.0645
Shezi Fm.	WD1-387	278.58	203.283	-24.3932	17.2614		1.9204	0.111254
Shezi Fm.	WD1-388	279.99	203.3				1.7801
Shezi Fm.	WD1-389	280.82	203.31	-24.9099	12.1399		10.9976	0.905904
Shezi Fm.	WD1-390	281.62	203.319				7.104
Shezi Fm.	WD1-391	283.7	203.344	-24.915	15.959	36.7626	88.2098	5.52727			58.9072	0.9302	20.0327	7.9619	0.0394	2.2892	0.3713	0.3792	3.988	0.1337	4.955	79.0932
Shezi Fm.	WD1-392	284.45	203.353				24.1131
Shezi Fm.	WD1-393	286.84	203.381				209.36
Shezi Fm.	WD1-394	287.43	203.388				24.2625
Shezi Fm.	WD1-395	289.39	203.411	-25.73	15.2832	6.1052	14.3201	0.93698			66.5638	0.8433	20.3735	2.0727	0.0168	0.6833	0.2362	0.3586	2.7476	0.0673	5.691	84.1684
Shezi Fm.	WD1-396	290.84	203.428				2.4431
Shezi Fm.	WD1-397	292.84	203.452	-24.8565	17.3088		2.2024	0.127241
Shezi Fm.	WD1-398	294.7	203.474				14.9077
Shezi Fm.	WD1-399	295.84	203.488	-24.8554	10.6232		3.4355	0.323395
Shezi Fm.	WD1-400	297.14	203.5				48.2928
Shezi Fm.	WD1-401	298.24	203.51	-24.8948	9.83811	38.9753	7.8618	0.799117			63.4893	0.8937	20.0994	4.622	0.0224	1.1066	0.245	0.409	3.8386	0.054	5.027	79.6231
Shezi Fm.	WD1-402	299.94	203.525				13.6546
Shezi Fm.	WD1-403	301.72	203.541	-24.6859	41.9164		9.0127	0.215016
Shezi Fm.	WD1-404	303.44	203.557				54.989
Shezi Fm.	WD1-405	304.84	203.569	-24.5987		22.4495	11.1922				59.9555	0.8224	17.1688	6.5241	0.1278	2.3868	1.4054	0.8583	3.2953	0.1994	6.912	72.8744
Shezi Fm.	WD1-406	306.31	203.582				10.1097
Shezi Fm.	WD1-407	317.57	203.683	-24.9078	89.1049		26.1679	0.293675
Shezi Fm.	WD1-408	309.61	203.612				3.9664
Shezi Fm.	WD1-409	310.84	203.623	-25.025	57.4737		114.226	1.98746
Shezi Fm.	WD1-410	311.94	203.633				100.195
Shezi Fm.	WD1-411	313.71	203.648	-25.0492	35.1905	2.56603	44.5005	1.26456			59.7867	0.957	23.0637	3.2342	0.0072	1.4261	0.271	0.4098	4.0552	0.0491	5.951	80.9189
Shezi Fm.	WD1-412	315.71	203.666				9.811
Shezi Fm.	WD1-413	317.33	203.681	-25.4013			72.4973
Shezi Fm.	WD1-414	318.54	203.691				29.1846
Shezi Fm.	WD1-415	319.84	203.703	-24.8494	86.0799	18.752	33.8666	0.393432			65.9358	0.7214	13.1897	4.7415	0.0646	2.5146	2.3964	1.2571	1.9221	0.1983	6.776	67.9667
Shezi Fm.	WD1-416	321.77	203.72				21.3737
Shezi Fm.	WD1-417	322.84	203.73	-26.4551			47.3651
Shezi Fm.	WD1-418	326.68	203.764				251.381
Shezi Fm.	WD1-419	325.84	203.757	-25.025	77.567		20.0381	0.258333
Shezi Fm.	WD1-420	327.43	203.771				11.733
Shezi Fm.	WD1-421	328.84	203.783			84.8565	233.269				54.4566	0.8714	20.5633	3.4709	0.0255	1.1529	0.5054	0.3146	2.0857	0.1483	16.028	86.198
Shezi Fm.	WD1-422	330.46	203.798				66.1531
Shezi Fm.	WD1-423	332.32	203.814	-25.0896	97.9391		8.9228	0.0911056
Shezi Fm.	WD1-424	333.88	203.828				8.1256
Shezi Fm.	WD1-425	334.89	203.837	-27.9346		38.4863	60.3743				53.1446	0.8998	20.7138	8.3047	0.1221	2.2862	0.9283	0.4018	3.6333	0.2403	9.062	79.7655
Shezi Fm.	WD1-426	335.64	203.844				87.048
Shezi Fm.	WD1-427	337.84	203.864	-25.1976	46.1104		8.4157	0.182512
Shezi Fm.	WD1-428	339.26	203.876				81.05
Shezi Fm.	WD1-429	340.84	203.89	-25.0099	17.712		6.4948	0.36669
Shezi Fm.	WD1-430	342.58	203.906				14.0798
Shezi Fm.	WD1-431	343.84	203.917	-25.0967	85.8251	23.7413	7.8257	0.091182			56.9594	0.9174	19.215	6.5881	0.0711	2.7125	1.3313	0.6258	3.7822	0.1885	7.137	75.7459
Shezi Fm.	WD1-432	345.79	203.934				9.3027
Shezi Fm.	WD1-433	346.6	203.942	-24.8474			54.2301
Shezi Fm.	WD1-434	348.69	203.96				8.5338
Shezi Fm.	WD1-435	349.64	203.969	-25.0321	55.6738	12.5964	22.4717	0.403631			69.5251	0.4911	9.1836	3.5257	0.1259	1.6376	5.0185	1.3792	1.1368	0.1326	7.672	61.4216
Shezi Fm.	WD1-436	350.98	203.981				13.9769
Shezi Fm.	WD1-437	352.69	203.996	-25.4035	85.9976		8.8187	0.102546
Shezi Fm.	WD1-438	354.9	204.016				25.9851
Shezi Fm.	WD1-439	355.84	204.024	-25.0418	15.7628		38.7937	2.4611
Shezi Fm.	WD1-440	356.05	204.026				31.8973
Shezi Fm.	WD1-441	358.84	204.051	-24.8686		27.9735	24.5951				56.7863	0.9552	18.0635	6.9999	0.1047	2.7903	1.5119	0.9939	3.3545	0.2274	7.426	72.3572
